# Supplementary material for: Metabolic Score for Insulin Resistance Is Inversely Related to Incident Advanced Liver Fibrosis in Patients with Non-Alcoholic Fatty Liver Disease
Source: MDPI journal article supplement (doi:10.3390/nu14153039), 2022-07-24
Supplement: s1 [file s1]

**Table S1.** Baseline characteristics of participants with NAFLD with or without ALF at the baseline survey.

| Variables                          | Without ALF         | With ALF            | Total               | <i>p</i> * |
|------------------------------------|---------------------|---------------------|---------------------|------------|
| Number of participants, n          | 2148                | 70                  | 2218                |            |
| Male sex, n (%)                    | 911 (42.4%)         | 47 (67.1%)          | 958 (43.2%)         | < 0.001    |
| Age, years                         | 54.1 ± 8.7          | 60.1 ± 7.2          | 54.3 ± 8.7          | < 0.001    |
| Waist circumference                | 89.0 ± 7.6          | 84.3 ± 9.8          | 88.9 ± 7.7          | < 0.001    |
| Body mass index, kg/m <sup>2</sup> | 26.6 ± 3.0          | 23.5 ± 3.7          | 26.5 ± 3.0          | < 0.001    |
| MBP, mmHg                          | 102.8 ± 12.4        | 102.4 ± 13.5        | 102.8 ± 12.4        | 0.811      |
| Current drinker, n (%)             | 793 (37.3%)         | 40 (59.7%)          | 833 (38.0%)         | < 0.001    |
| Smoking status, n (%)              |                     |                     |                     | < 0.001    |
| Never smoker                       | 1350 (63.8%)        | 27 (40.3%)          | 1377 (63.0%)        |            |
| Former smoker                      | 318 (15.0%)         | 16 (23.9%)          | 334 (15.3%)         |            |
| Someday smoker                     | 47 (2.2%)           | 5 (7.5%)            | 52 (2.4%)           |            |
| Everyday smoker                    | 402 (19.0%)         | 19 (28.4%)          | 421 (19.3%)         |            |
| Physical activity                  |                     |                     |                     | 0.482      |
| < 7.5 METs-hr/week                 | 205 (10.0%)         | 5 (7.7%)            | 210 (9.9%)          |            |
| 7.5–30 METs-hr/week                | 1258 (61.2%)        | 37 (56.9%)          | 1295 (61.1%)        |            |
| ≥ 30 METs-hr/week                  | 592 (28.8%)         | 23 (35.4%)          | 615 (29.0%)         |            |
| Platelets, /mm <sup>3</sup>        | 279.2 ± 63.5        | 142.9 ± 66.0        | 274.9 ± 67.9        | < 0.001    |
| FPG, mg/dL                         | 96.4 ± 29.9         | 100.1 ± 33.3        | 96.5 ± 30.0         | 0.303      |
| Insulin, µIU/mL                    | 10.1 [ 7.6;12.7]    | 7.3 [ 5.2;11.6]     | 10.1 [ 7.5;12.6]    | < 0.001    |
| Total cholesterol, mg/dL           | 201.6 ± 35.9        | 170.5 ± 41.0        | 200.6 ± 36.5        | < 0.001    |
| triglyceride, mg/dL                | 189.0 [146.0;258.0] | 139.5 [104.0;196.0] | 187.0 [144.0;256.0] | < 0.001    |
| HDL cholesterol, mg/dL             | 40.1 ± 8.2          | 46.5 ± 13.9         | 40.3 ± 8.5          | < 0.001    |
| LDL cholesterol, mg/dL             | 120.7 ± 32.8        | 89.7 ± 36.5         | 119.7 ± 33.3        | < 0.001    |
| AST, U/L                           | 28.0 [24.0;35.5]    | 75.5 [47.0;117.0]   | 29.0 [24.0;36.0]    | < 0.001    |
| ALT, U/L                           | 30.0 [22.0;44.0]    | 49.0 [36.0;77.0]    | 31.0 [23.0;45.0]    | 0.007      |
| Gamma-GTP, U/L                     | 27.0 [16.0;48.0]    | 116.0 [32.0;329.0]  | 27.0 [16.0;49.0]    | < 0.001    |
| Total bilirubin, mg/dL             | 0.5 [ 0.4; 0.7]     | 0.6 [ 0.4; 0.9]     | 0.5 [ 0.4; 0.7]     | 0.001      |
| Albumin, g/L                       | 4.2 ± 0.3           | 4.0 ± 0.4           | 4.2 ± 0.3           | < 0.001    |
| CRP, mg/dL                         | 0.19 [0.10;0.31]    | 0.13 [0.05;0.31]    | 0.18 [0.10;0.31]    | 0.085      |
| Total caloric intake, kcal/day     | 1978.1 ± 729.3      | 1943.7 ± 810.7      | 1977.1 ± 731.8      | 0.705      |
| CHO intake, g/day                  | 353.6 ± 127.6       | 347.4 ± 143.1       | 353.4 ± 128.1       | 0.697      |
| Protein intake, g/day              | 66.2 ± 29.4         | 63.9 ± 31.0         | 66.2 ± 29.4         | 0.525      |
| Fat intake, g/day                  | 31.1 ± 20.6         | 30.5 ± 21.6         | 31.1 ± 20.6         | 0.821      |
| Vitamin E intake, mg/day           | 9.6 ± 5.8           | 8.5 ± 5.1           | 9.6 ± 5.8           | 0.140      |
| Diabetes mellitus, n (%)           | 671 (31.2%)         | 28 (40.0%)          | 699 (31.5%)         | 0.155      |
| Hypertension, n (%)                | 1329 (61.9%)        | 42 (60.0%)          | 1371 (61.8%)        | 0.848      |
| Dyslipidemia, n (%)                | 1579 (73.5%)        | 34 (48.6%)          | 1613 (72.7%)        | < 0.001    |
| Fibrosis-4 score                   | 1.0 [ 0.8; 1.3]     | 3.9 [ 3.1; 6.7]     | 1.0 [ 0.8; 1.4]     | < 0.001    |
| METS-IR                            | 43.52 ± 5.98        | 36.82 ± 8.41        | 43.31 ± 6.18        | < 0.001    |
| TyG index                          | 9.11 ± 0.53         | 8.89 ± 0.69         | 9.11 ± 0.54         | 0.008      |
| HOMA-IR                            | 2.64 ± 2.05         | 2.14 ± 1.60         | 2.62 ± 2.04         | 0.013      |

\* *p*-value for comparison of the baseline characteristics between patients with NAFLD with and without ALF. **Abbreviations:** NAFLD, non-alcoholic fatty liver disease; ALF, advanced liver fibrosis; SBP, systolic blood pressure; DBP, diastolic blood pressure; MET, metabolic equivalent of task; FPG, fasting plasma glucose; HDL, high-density lipoprotein; LDL, low-density lipoprotein; AST, aspartate aminotransferase; ALT, alanine aminotransferase; CRP, C-reactive protein; CHO, carbohydrate; METS-IR, metabolic score for insulin resistance; TyG, triglyceride-glucose; HOMA-IR, homeostatic model assessment for insulin resistance.

**Table S2.** Cox proportional hazards regression model for incident ALF of three different insulin resistance indices.

|                                | Numbers<br>, n | New-onset<br>ALF, n | Person-years<br>of follow-up | Incidence rate per<br>1000 person-years | Unadjusted       |          | Model 1          |          | Model 2          |          | Model 3          |          |
|--------------------------------|----------------|---------------------|------------------------------|-----------------------------------------|------------------|----------|------------------|----------|------------------|----------|------------------|----------|
|                                |                |                     |                              |                                         | HR (95% CI)      | <i>p</i> |
| METS-IR<br>(per 1 increment)   | 1368           | 260                 | 19939.4                      | 13.0                                    | 0.97 (0.95–0.99) | 0.003    | 0.93 (0.90–0.97) | 0.001    | 0.92 (0.88–0.96) | < 0.001  | 0.92 (0.88–0.96) | 0.001    |
| TyG index<br>(per 1 increment) |                |                     |                              |                                         | 0.71 (0.56–0.91) | 0.007    | 0.64 (0.49–0.84) | 0.001    | 0.64 (0.47–0.87) | 0.004    | 0.66 (0.49–0.89) | 0.007    |
| HOMA-IR<br>(per 1 increment)   |                |                     |                              |                                         | 1.02 (0.98–1.06) | 0.844    | 1.02 (0.95–1.10) | 0.582    | 1.02 (0.94–1.10) | 0.700    | 1.03 (0.95–1.11) | 0.504    |

Model 1: adjusted for sex, age, body mass index, physical activity, smoking status, drinking status, total caloric intake, and vitamin E intake. Model 2: adjusted for variables used in Model 1 plus mean blood pressure, serum total cholesterol level, and serum CRP level. Model 3: adjusted for variables used in Model 2 plus serum ALT level. Abbreviations: ALF, advanced liver fibrosis; HR, hazard ratio; CI, confidence interval; METS-IR, metabolic score for insulin resistance; TyG, triglyceride-glucose; HOMA-IR, homeostatic model assessment for insulin resistance; CRP, C-reactive protein; ALT, alanine aminotransferase.

**Table S3.** Cox proportional hazards regression model for incident ALF of three different insulin resistant indices according to the presence of diabetes.

|                        | Unadjusted model |          | Fully adjusted model |          |
|------------------------|------------------|----------|----------------------|----------|
|                        | HR (95% CI)*     | <i>p</i> | HR (95% CI)*         | <i>p</i> |
| <b>DM subgroup</b>     |                  |          |                      |          |
| METs-IR                |                  |          |                      |          |
| T1 (< 41.15)           | 1 (reference)    |          | 1 (reference)        |          |
| T2 (41.15–45.70)       | 0.80 (0.47–1.36) | 0.415    | 0.86 (0.44–1.66)     | 0.645    |
| T3 (≥ 45.71)           | 0.59 (0.35–1.01) | 0.056    | 0.55 (0.23–1.33)     | 0.183    |
| TyG index              |                  |          |                      |          |
| T1 (< 8.84)            | 1 (reference)    |          | 1 (reference)        |          |
| T2 (8.84–9.26)         | 1.38 (0.75–2.53) | 0.301    | 1.14 (0.57–2.28)     | 0.710    |
| T3 (≥ 9.27)            | 0.86 (0.47–1.56) | 0.623    | 0.92 (0.47–1.79)     | 0.796    |
| HOMA-IR                |                  |          |                      |          |
| T1 (< 1.91)            | 1 (reference)    |          | 1 (reference)        |          |
| T2 (1.91–2.65)         | 1.21 (0.67–2.18) | 0.537    | 1.34 (0.70–2.56)     | 0.376    |
| T3 (≥ 2.65)            | 0.97 (0.57–1.68) | 0.925    | 0.93 (0.50–1.70)     | 0.803    |
| <b>Non-DM subgroup</b> |                  |          |                      |          |
| METs-IR                |                  |          |                      |          |
| T1 (< 41.15)           | 1 (reference)    |          | 1 (reference)        |          |
| T2 (41.15–45.70)       | 0.94 (0.67–1.32) | 0.415    | 0.75 (0.50–1.15)     | 0.186    |
| T3 (≥ 45.71)           | 0.70 (0.48–1.01) | 0.059    | 0.56 (0.32–0.99)     | 0.046    |
| TyG index              |                  |          |                      |          |
| T1 (< 8.84)            | 1 (reference)    |          | 1 (reference)        |          |
| T2 (8.84–9.26)         | 0.81 (0.59–1.13) | 0.215    | 0.84 (0.58–1.21)     | 0.839    |
| T3 (≥ 9.27)            | 0.59 (0.40–0.88) | 0.009    | 0.61 (0.39–0.94)     | 0.025    |
| HOMA-IR                |                  |          |                      |          |
| T1 (< 1.91)            | 1 (reference)    |          | 1 (reference)        |          |
| T2 (1.91–2.65)         | 0.92 (0.65–1.32) | 0.659    | 1.03 (0.70–1.50)     | 0.897    |

---

|                    |                  |       |                  |       |
|--------------------|------------------|-------|------------------|-------|
| T3 ( $\geq 2.65$ ) | 1.24 (0.87–1.77) | 0.232 | 1.02 (0.69–1.53) | 0.908 |
|--------------------|------------------|-------|------------------|-------|

---

\*Variables including sex, age, body mass index, physical activity, smoking status, drinking status, total calorie intake, vitamin E intake, mean blood pressure, serum total cholesterol level, serum CRP level, and serum ALT level were used in the fully adjusted model. Abbreviations: DM, diabetes mellitus; HR, hazard ratio; CI, confidence interval; METS-IR, metabolic score for insulin resistance; TyG, triglyceride-glucose; HOMA-IR, homeostatic model assessment for insulin resistance; CRP, C-reactive protein; ALT, alanine aminotransferase.

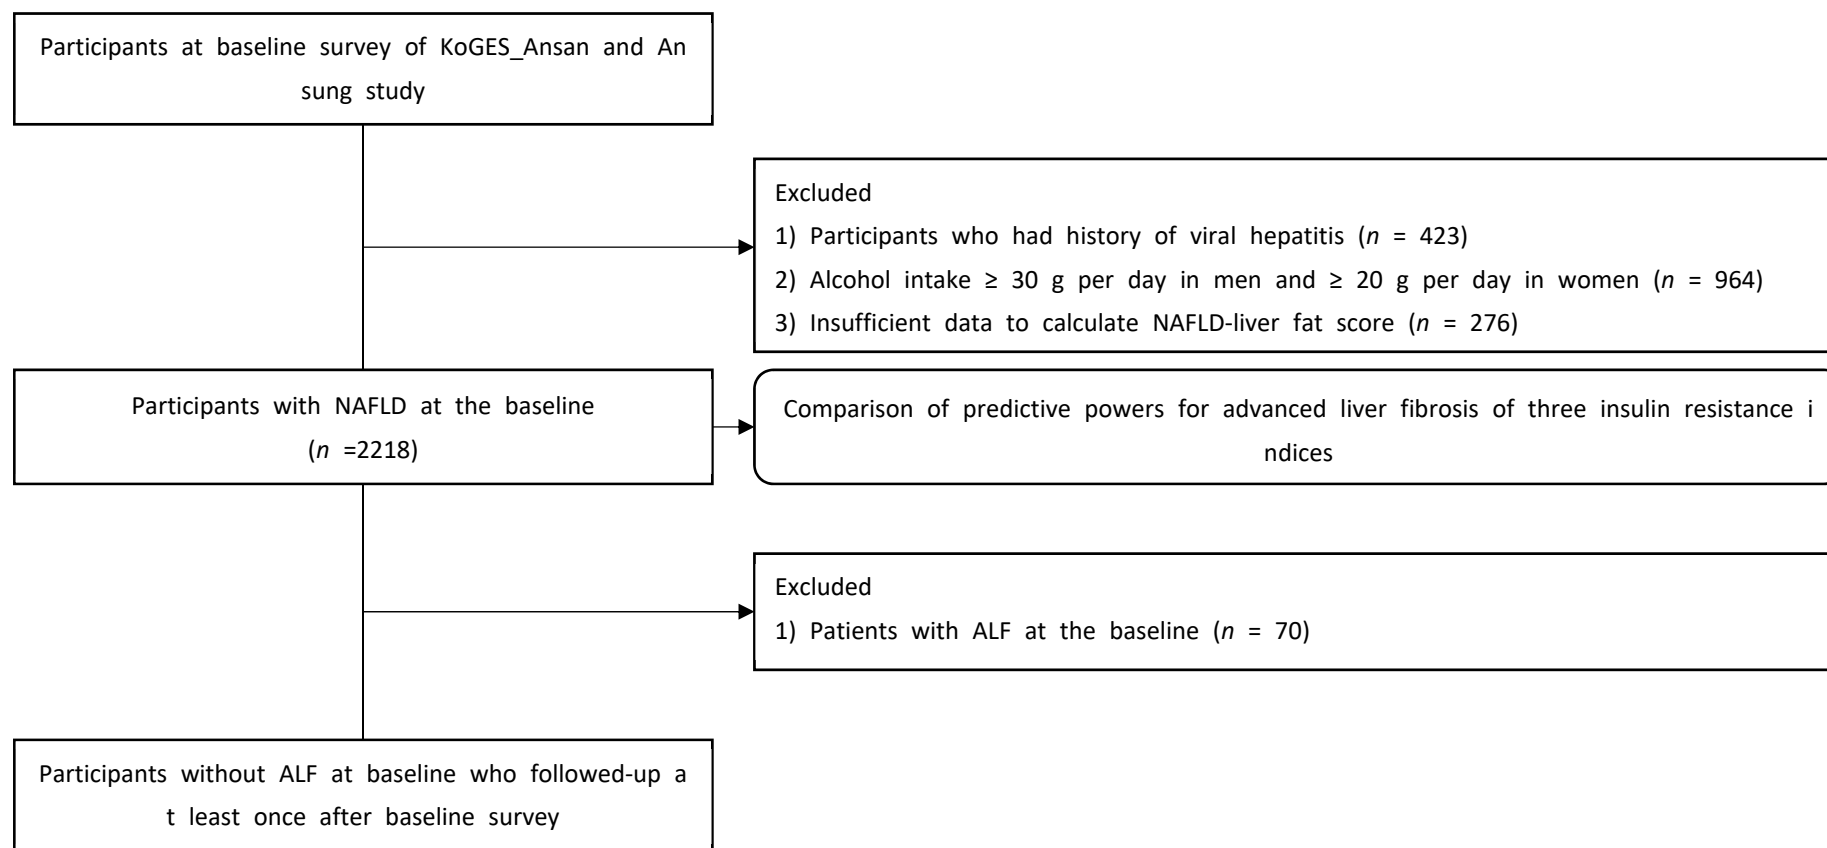

**Figure S1.** Flow chart of the study population. Abbreviation: NAFLD, non-alcoholic fatty liver disease; ALF, advanced liver fibrosis; KoGES, Korean Genome and Epidemiology Study; METS-IR, metabolic score for insulin resistance, TyG, triglyceride-glucose; HOMA-IR, homeostatic model assessment for insulin resistance

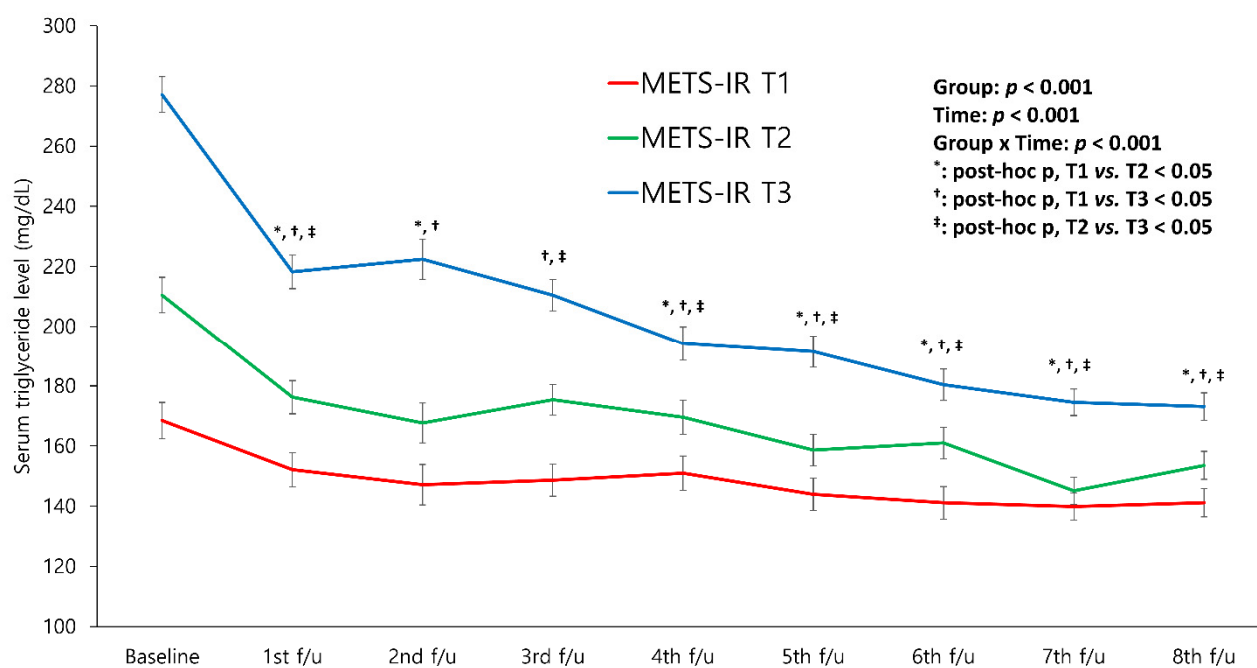

**Figure S2.** Longitudinal changes in serum triglyceride level according to the METS-IR tertiles. Abbreviation: METS-IR, metabolic score for insulin resistance.

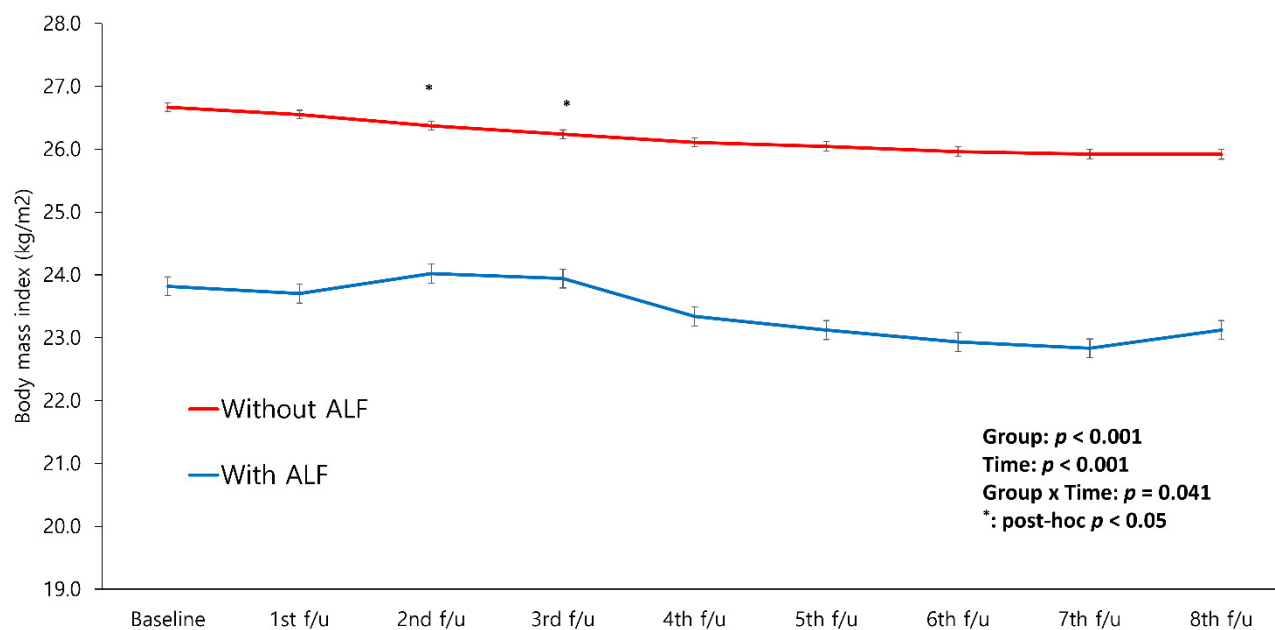

**Figure S3.** Longitudinal changes in body mass index according to advanced liver fibrosis status.

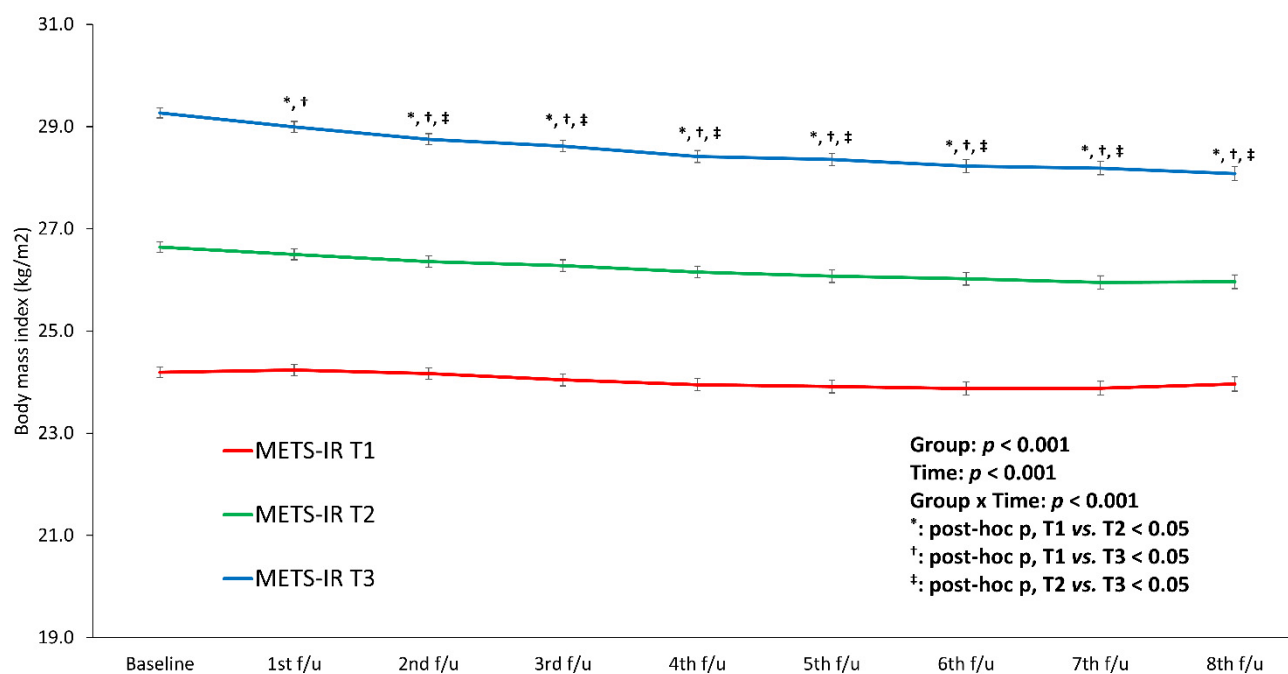

**Figure S4.** Longitudinal changes in body mass index according to the METS-IR tertiles. Abbreviations: METS-IR, metabolic score for insulin resistance.
